# Supplementary material
Source: PubMed Central journal article supplement (PMC6467689)
Supplement: NIHMS1001793-supplement-SI.pdf [file NIHMS1001793-supplement-SI.pdf]

# Supporting Information

## Small molecule condensin inhibitors

Hang Zhao, Zoya M. Petrushenko, John K. Walker, Jerome Baudry, Helen I. Zgurskaya,  
Valentin V. Rybenkov

### Table of content

|                                                              |         |
|--------------------------------------------------------------|---------|
| Figure S1. Structure of the hit compounds                    | Page S2 |
| Figure S2. Morphology of compound-treated cells              | Page S2 |
| Figure S3. Michellamine-induced protein aggregation          | Page S3 |
| Figure S4. Interactions of the hit compounds with MukB       | Page S4 |
| Figure S5. Expression of mutant MukB                         | Page S4 |
| Figure S6. Potentiation of ciprofloxacin by NSC260594        | Page S5 |
| Figure S7. Lack of spontaneous suppressors of NSC260594      | Page S5 |
| Table S1. Novobiocin potentiation by the hit compounds       | Page S6 |
| Table S2. Antibacterial activity of NSC260594 and its analog | Page S6 |
| Table S3. Strains used in this study                         | Page S7 |
| Table S4. Tested point mutants of MukB                       | Page S8 |
| Supplemental References                                      | Page S9 |

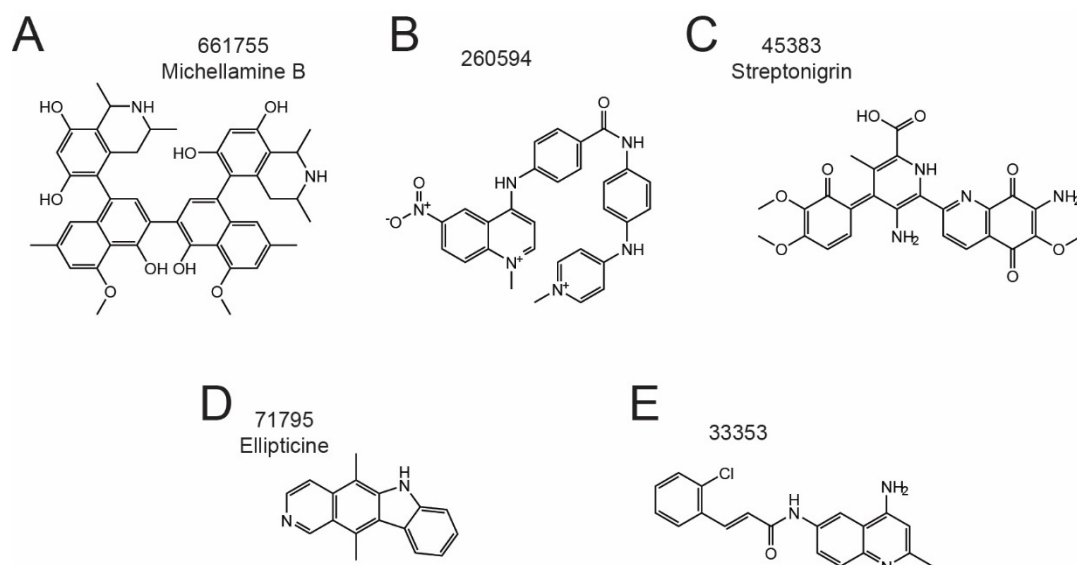

**Figure S1.** Chemical structure of the hit compounds.

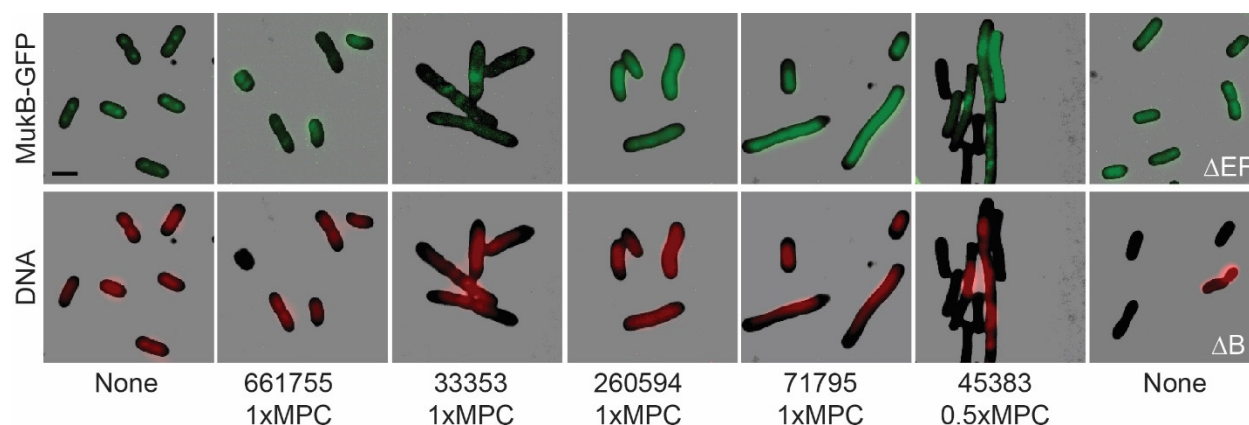

**Figure S2.** Formation of anucleate and afocal cells upon treatment with the hit compounds.

10,000 exponential  $\Delta mukEF mukB-gfp$  OU152 ( $\Delta EF$ ),  $\Delta mukB \Delta tolC$  OU142 ( $\Delta B$ ) or  $\Delta tolC mukB-gfp$  OU151 (otherwise) cells were grown overnight in LB at a permissive temperature (23 °C for OU152 and OU142 cells, 37 °C for OU151 cells), transferred into fresh LB medium, supplemented with the indicated compounds and incubated at 37 °C for 16 hours. Subcellular localization of MukB-GFP was observed using fluorescence microscopy. Anucleate cells were detected as previously described<sup>7</sup> after staining the DNA with DAPI and protein with Sypro Orange. Size bar, 1  $\mu m$ .

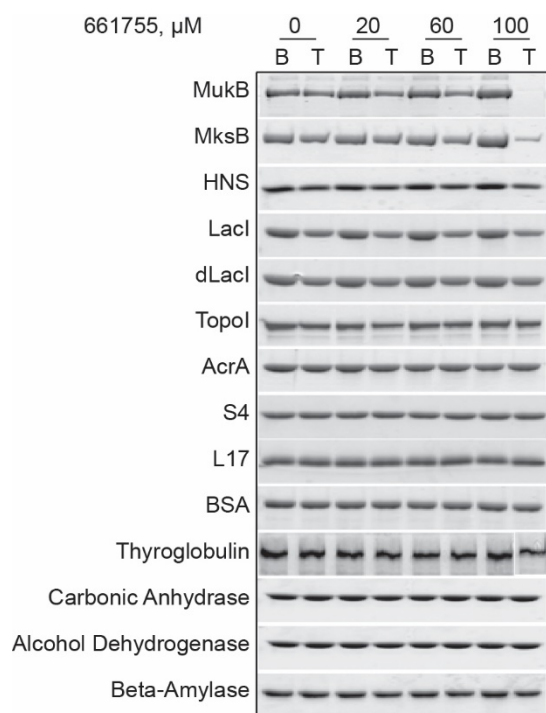

**Figure S3.** Evaluation of Michellamine-induced protein aggregation. Tested were: *E. coli* MukB, *P. aeruginosa* MksB, *E. coli* HNS, *lac* repressor LacI, the dimeric LacI unable to form tetramers, dLacI, wheat germ topoisomerase I, *E. coli* membrane fusion protein AcrA, ribosomal proteins S4 and L17 from *E. coli*, bovine serum albumin, BSA, and calf thymus thyroglobulin, carbonic anhydrase, alcohol dehydrogenase and  $\beta$ -amylase.

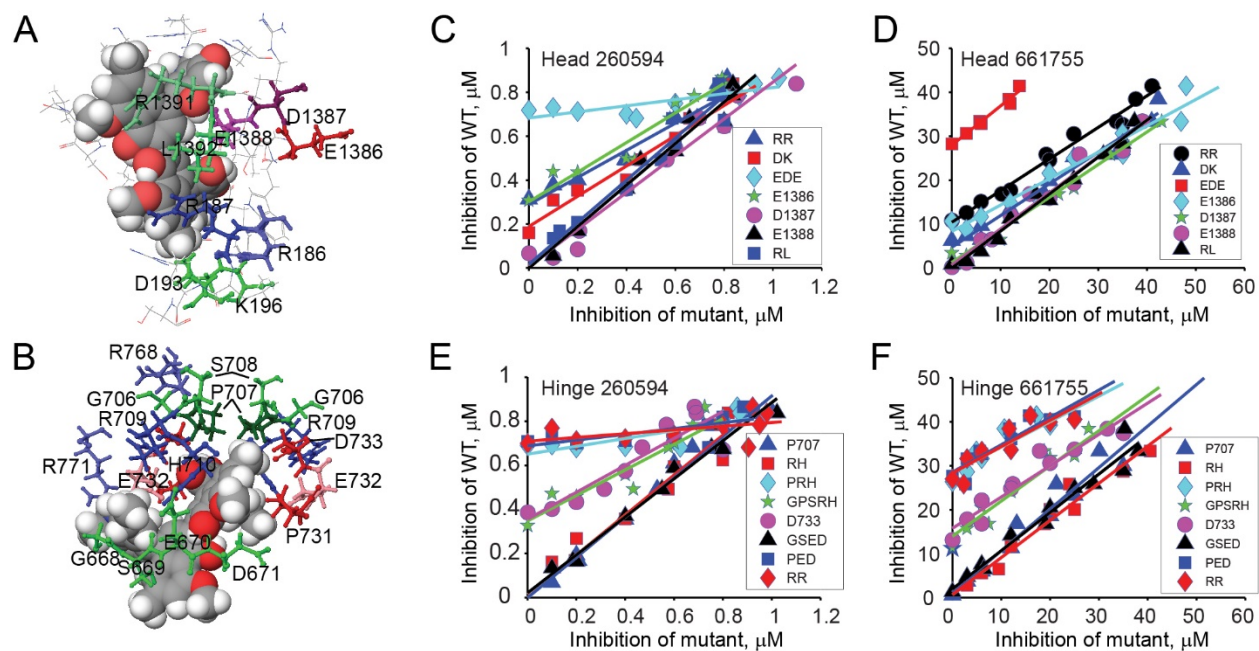

**Figure S4.** Interaction of Michellamine B and 260594 with the hinge and head domains of MukB. Compounds are shown in spheres, side chains are shown for residues in the binding sites (A, B) The interaction environment for Michellamine B in the head (A) and hinge (B). (C-F) Inhibition curves for the hinge and head domain mutants for Michellamine and NSC260594, as indicated.

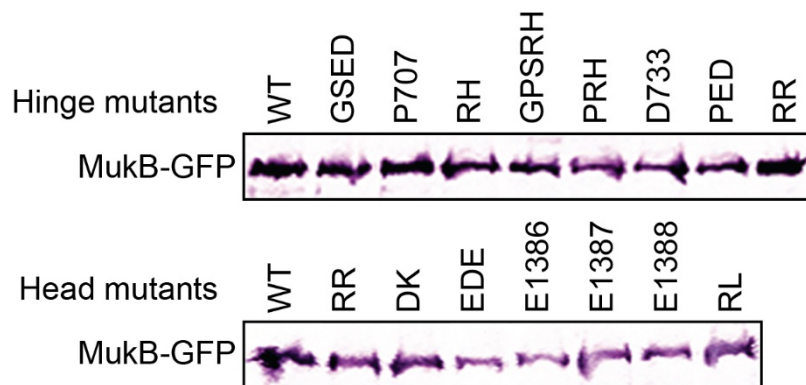

**Figure S5.** Expression of mutant variants of MukB-GFP from p15sp-B02a plasmid. 0.1 OD of *ΔtolCΔmukB* cells harboring the indicated plasmids were analyzed by immunoblotting using anti-GFP antibody.

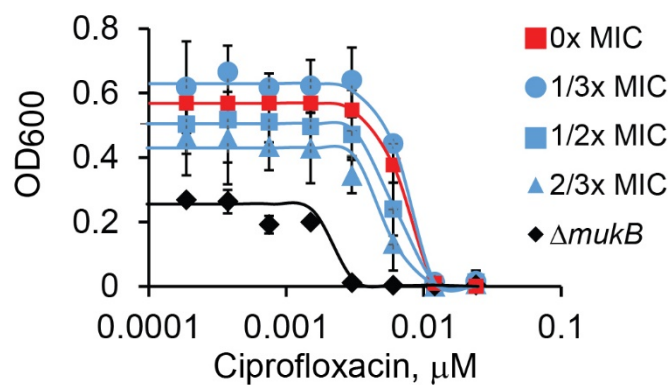

**Figure S6.** Potentiation of ciprofloxacin by NSC260594 in  $\Delta toIC$  *E. coli*.

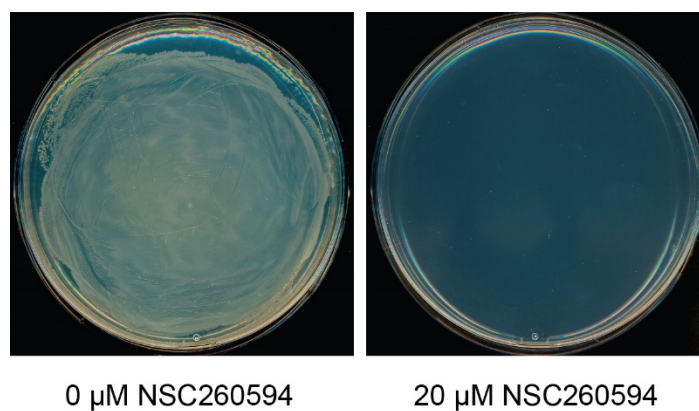

**Figure S7.** Frequency of spontaneous suppressor mutations.  $1.5 \cdot 10^9$  exponential BW25115  $\Delta toIC$  cells were spread over three LB plates containing the indicated concentration of NSC250594 and incubated for 24 h at 37  $^{\circ}\text{C}$ .

**Table S1.** Minimal inhibitory concentrations of the hit compounds in the presence or absence of 1/4x MIC of novobiocin ( $\pm$ SEM;  $\mu$ M).

| Compound | $\Delta toIC$   |                 | $\Delta toIC\Delta mukB$ |                 |
|----------|-----------------|-----------------|--------------------------|-----------------|
|          | - novo          | + novo          | - novo                   | + novo          |
| 33353    | 9.2 $\pm$ 1     | 3.3 $\pm$ 0.1   | 4.6 $\pm$ 0.6            | 4.6 $\pm$ 0.2   |
| 260594   | 0.87 $\pm$ 0.03 | 0.45 $\pm$ 0.01 | 0.3 $\pm$ 0.02           | 0.33 $\pm$ 0.01 |
| 661755   | 33 $\pm$ 3      | 12 $\pm$ 0.3    | 24 $\pm$ 0.8             | 19 $\pm$ 4      |
| 45383    | 0.6 $\pm$ 0.03  | 0.34 $\pm$ 0.03 | 0.27 $\pm$ 0.01          | 0.28 $\pm$ 0.01 |
| 71795    | 15 $\pm$ 2      | 10 $\pm$ 1.5    | 9.8 $\pm$ 0.5            | 8.4 $\pm$ 0.4   |

**Table S2.** Minimal inhibitory concentrations of NSC260594 and NSC176319.

| Strain                        | 260594, $\mu$ M ( $\mu$ g/ml) | 176319, $\mu$ M ( $\mu$ g/ml) |
|-------------------------------|-------------------------------|-------------------------------|
| <i>E. coli</i> BW25115        | 32 (16)                       | 20 (13)                       |
| <i>E. coli</i> ETBW           | 2.5 (1.3)                     | 1 (0.6)                       |
| <i>P. aeruginosa</i> GK CW122 | 14 (7)                        | 5 (3)                         |
| <i>A. baumannii</i> IL123     | 3.5 (1.8)                     | 2.5 (1.6)                     |
| <i>S. aureus</i> ATCC 25923   | 28 (14)                       | 10 (6)                        |

**Table S3.** Strains used in this study.

| Strain                         | Relevant Genotype                                                                                                                 | Source        |
|--------------------------------|-----------------------------------------------------------------------------------------------------------------------------------|---------------|
| <i>E. coli</i>                 |                                                                                                                                   |               |
| MG1655                         | Wild type <i>E. coli</i>                                                                                                          | Lab stock     |
| BW25113                        | Wild type <i>E. coli</i>                                                                                                          | 2             |
| ETBW                           | BW25113 $\Delta tolC::Km^r$                                                                                                       | 3             |
| OU142                          | BW25113 $\Delta tolC \Delta mukB:: Km^r$                                                                                          | 4             |
| OU151                          | MG1655 $\Delta mukB:: Km^r lacYA::mukB-gfp-spc^r \Delta tolC::cam$                                                                | This study    |
| OU152                          | MG1655 $\Delta mukEF:: Km^r lacYA::mukB-gfp-spc^r$                                                                                | This study    |
| <i>Pseudomonas aeruginosa</i>  |                                                                                                                                   |               |
| PaGKCW111                      | PAO1 $attTn7::mini-Tn7T-Gm^r-lacI^q$ -pLAC-MCS                                                                                    | 5             |
| GKCW122                        | PAO1 $\Delta 6 attTn7::mini-Tn7T- Gm^r-lacI^q$ -pLAC- <i>fhuA</i> $\Delta C/\Delta 4L$                                            | 5             |
| <i>Staphylococcus aureus</i>   |                                                                                                                                   |               |
| SA                             | <i>Staphylococcus aureus</i> subsp. <i>aureus</i> Rosenbach ATCC 25923                                                            | ATCC          |
| <i>Acinetobacter baumannii</i> |                                                                                                                                   |               |
| JWW19                          | ATCC 17978 $attTn7::miniTn7-Tp^r-araC-P_{araBAD}$ -MCS (pTJ1)                                                                     | 5             |
| IL123                          | ATCC 17978 $\Delta 3 attTn7::miniTn7-Tp^r-araC-P_{araBAD}$ -<br><i>fhuA</i> (FhuA $\Delta$ Cork $\Delta$ 4Loop, 6His) (pTJ1-FhuA) | 5             |
| Human cell lines               |                                                                                                                                   |               |
| HEK293                         | Human embryonic kidney cells                                                                                                      | ATCC CRL-1573 |

Spc<sup>r</sup>, Gm<sup>r</sup>, Tp<sup>r</sup>, Km<sup>r</sup>, *cam*, genes encoding resistance to spectinomycin, gentamicin, trimethoprim, kanamycin and chloramphenicol, respectively.

**Table S4.** Point mutations in MukB.

| Name of mutant              | Mutations                     |
|-----------------------------|-------------------------------|
| <i>Hinge domain mutants</i> |                               |
| P707                        | P707A                         |
| RH                          | R709 H710                     |
| PRH                         | P707A R709E H710A             |
| GPSRH                       | G706A P707A A708A R709E H710A |
| D733                        | D733R                         |
| GSED                        | G668A S669A E670R D671A       |
| PED                         | P731A E732A D733A             |
| RR                          | R768E R771E                   |
| <i>Head domain mutants</i>  |                               |
| RR                          | R186A R187A                   |
| DK                          | D193A K196A                   |
| EDE                         | E1386A D1387A E1388A          |
| E1386                       | E1386A                        |
| E1387                       | E1387A                        |
| E1388                       | E1388A                        |
| RL                          | R1391A L1392A                 |



## Supplemental References

- (1) Wang, Q., Mordukhova, E. A., Edwards, A. L., and Rybenkov, V. V. (2006) Chromosome condensation in the absence of the non-SMC subunits of MukBEF, *J Bacteriol* 188, 4431-4441 DOI 10.1128/JB.00313-06.
- (2) Datsenko, K. A., and Wanner, B. L. (2000) One-step inactivation of chromosomal genes in *Escherichia coli* K-12 using PCR products, *Proc Natl Acad Sci U S A* 97, 6640-6645 DOI 10.1073/pnas.120163297.
- (3) Dhamdhare, G., and Zgurskaya, H. I. (2010) Metabolic shutdown in *Escherichia coli* cells lacking the outer membrane channel TolC, *Mol Microbiol* 77, 743-754 DOI 10.1111/j.1365-2958.2010.07245.x.
- (4) Petrushenko, Z. M., Zhao, H., Zgurskaya, H. I., and Rybenkov, V. V. (2016) Novobiocin susceptibility of MukBEF-deficient *Escherichia coli* is combinatorial with efflux and resides in DNA topoisomerases, *Antimicrob Agents Chemother* 60, 2949-2953 DOI 10.1128/AAC.03102-15.
- (5) Krishnamoorthy, G., Leus, I. V., Weeks, J. W., Wolloscheck, D., Rybenkov, V. V., and Zgurskaya, H. I. (2017) Synergy between active efflux and outer membrane diffusion defines rules of antibiotic permeation into Gram-negative bacteria, *MBio* 8, e01172-01117 DOI 10.1128/mBio.01172-17.
